# The zebrafish embryo as an *in vivo* model for screening nanoparticle-formulated lipophilic anti-tuberculosis compounds

Nils-Jørgen Knudsen Dal<sup>1#</sup>, Martin Speth<sup>1#\*</sup>, Kerstin Johann<sup>2</sup>, Matthias Barz<sup>2,3</sup>, Claire Beauvineau<sup>4</sup>, Jens Wohlmann<sup>1</sup>, Federico Fenaroli<sup>1</sup>, Brigitte Gicquel<sup>5,6</sup>, Gareth Griffiths<sup>1</sup>, and Noelia Alonso-Rodriguez<sup>1\*</sup>

<sup>1</sup>*Department Biosciences, Faculty of Mathematics and Natural Sciences, University of Oslo (Norway)*

<sup>2</sup>*Department of Chemistry, Johannes Gutenberg University Mainz (Germany)*

<sup>3</sup>*Division of BioTherapeutics, Leiden Academic Center for Drug Research (LACDR), Leiden University (The Netherlands)*

<sup>4</sup>*Chemical Library Institut Curie/CNRS, CNRS UMR9187, INSERM U1196 and CNRS UMR3666, INSERM U1193, Université Paris-Saclay, F-91405 Orsay, (France)*

<sup>5</sup>*Génétique Mycobactérienne, Dep Génomes and Génétique, Institute Pasteur, Paris (France)*

<sup>6</sup>*Department of Tuberculosis Control and Prevention, Shenzhen Nanshan Center for Chronic Disease Control, Shenzhen (China)*

<sup>#</sup> *These authors contributed equally*

<sup>\*</sup> *Corresponding authors*

**KEYWORDS:** zebrafish tuberculosis model, anti-tuberculosis drugs, nanoparticles, *in vivo* toxicity, *in vivo* efficacy

## SUMMARY STATEMENT

The zebrafish embryo is a quick, sensitive and powerful tool for evaluating the *in vivo* toxicity and efficacy of newly identified lipophilic anti-tuberculosis compounds formulated in nanoparticles.

## ABSTRACT

With the increasing emergence of drug-resistant *Mycobacterium tuberculosis* strains, new and effective antibiotics against tuberculosis (TB) are urgently needed. However, the high frequency of poorly water-soluble compounds among hits in high-throughput drug screening (HTS) campaigns is a major obstacle in drug discovery. Moreover, *in vivo* testing using conventional animal TB models such as mice is time-consuming and costly, and represents a major bottleneck in lead compound discovery and development. Here, we report the use of the zebrafish embryo TB model, to evaluate the *in vivo* toxicity and efficacy of five poorly water-soluble nitronaphthofuran derivatives, which were recently identified to possess anti-tuberculosis activity *in vitro*. To aid solubilization compounds were formulated in biocompatible polymeric micelles (PM). Three of the five PM-formulated nitronaphthofuran derivatives showed low toxicity *in vivo*, significantly reduced bacterial burden and improved survival in infected zebrafish embryos. We propose the zebrafish embryo TB-model as a quick and sensitive tool for evaluating *in vivo* toxicity and efficacy of new anti-TB compounds during early stages of drug development. Thus, this model is well suited to pinpoint promising compounds for further development.

## INTRODUCTION

Tuberculosis (TB), caused by the bacterium *Mycobacterium tuberculosis* (Mtb), is one of the deadliest infectious diseases worldwide. Annually, ten million people fall ill with TB, of whom approximately 1.4 million die (World Health Organization, 2020). Reducing the total burden of TB is difficult due to the extensive reservoir of latently infected individuals who are at risk of developing active disease in their lifetime (Houben and Dodd, 2016). The alarming increase in cases of drug-resistant TB in recent years highlights the urgency for new effective anti TB-drugs or regimens that will shorten the duration of treatment and improve cure rates (Lange et al., 2018; World Health Organization, 2020).

In recent years, the use of phenotypic high throughput screening (HTS) of large-scale compound libraries against whole-cell Mtb or surrogate mycobacteria, such as *Mycobacterium bovis* BCG, has proven to be a powerful strategy in the quest to identify new anti-TB drug candidates. Phenotypic HTS has resulted in the discovery of the recently approved anti-TB drugs such as bedaquiline, pretomanid and delamanid, as well as other anti-TB drug candidates currently in clinical trials (Grzelak et al., 2019). However, the phenotypic HTS approach has been shown to be inherently biased towards identifying lipophilic, and thus less water-soluble molecules (Goldman, 2013). Indeed, lipophilicity is positively correlated with anti-mycobacterial activity, likely due to the fact that the thick, lipid-rich and waxy cell wall structure of Mtb constitutes a close to impenetrable barrier for hydrophilic molecules (Machado et al., 2018). High lipophilicity and low water solubility, however, is

considered to be a ‘red flag’ in medicinal chemistry due to the potential negative effects on ADME (absorption, distribution, metabolism and elimination) often associated with toxic properties of candidate compounds (Lipinski, 2000; Tarcsay and Keseru, 2013; Waring, 2010). Such compounds are either rejected from the drug discovery process at early stages or are subjected to chemical modifications, with the aim of reducing their lipophilic nature, increase their water solubility and as a consequence making them easier to administer and improving their bioavailability (Di et al., 2012). However, alteration of the drug structure presents the risk of reducing the anti-mycobacterial activity (Kondreddi et al., 2013; Manjunatha and Smith, 2015).

In recent years, nanoparticle technology has emerged as an alternative and promising approach to improve unfavorable pharmacokinetic characteristics and low bioavailability of poorly water-soluble compounds (Kirtane et al., 2021). By virtue of their ability to encapsulate drugs in their matrix or core, nanoparticle-based formulations increase the bioavailability of lipophilic drugs and reduce drug-related toxicity (Kirtane et al., 2021; Melariri et al., 2015; Vibe et al., 2016). Importantly, nanoparticles (NP) can be designed to release their drug load in a sustained manner, thereby maintaining systemic levels above the minimum effective concentration over prolonged periods and, as a consequence increasing the efficacy of drugs compared to application of the free drugs alone (Griffiths et al., 2010; Sharma et al., 2004).

In many cases, overcoming poor solubility is a major challenge in progressing lipophilic drug candidates to the preclinical test stage and in particular to efficacy studies in animal models of TB. The *in vivo* efficacy of new anti-TB drug candidates is predominately assessed in conventional mouse or guinea pig models of TB. These *in vivo* studies are generally costly, time-consuming and require advanced BSL-3 research and animal facilities, thereby representing a considerable bottleneck in the drug discovery process (Andreu et al., 2013; Balganeshe et al., 2004). In recent years, the zebrafish embryo (*Danio rerio*) has been established as a powerful alternative *in vivo* TB model. Infection of zebrafish embryos with the natural fish pathogen *M. marinum* (Mm), a genetically close relative of Mtb, results in disease that recapitulates many key features of early stages of Mtb infection. Taking advantage of the transparent nature of the zebrafish embryo, major new insights have been achieved into the interaction of mycobacterial pathogens with host cells during early phases of infection (Davis et al., 2002; Johansen et al., 2018; Tobin and Ramakrishnan, 2008; Volkman et al., 2004). Moreover, the zebrafish TB model has been used to evaluate the *in vivo* efficacy of anti-TB drug candidates (Carvalho et al., 2011; Dalton et al., 2017; Makarov et al., 2014; Ordas et al., 2015; Takaki et al., 2012). The zebrafish embryo is also a well-established model organism in toxicology research and has been widely used to evaluate the *in vivo* toxicity of candidate drugs against a variety of diseases, such as epilepsy, cancer and bacterial infections (Cassar et al., 2020). Embryos can be conveniently kept in multi-well dishes and have been successfully used in numerous high throughput toxicology screening studies for example focusing on cardiotoxicity, hepatotoxicity and adverse behavioral effects (Cornet et al., 2017; Dyballa et al., 2019; Zhang et al., 2017).

In previous work, our group has used the zebrafish embryo model to characterize the toxicity and the efficacy of anti-TB drug-loaded NP against Mtb *in vivo* (Fenaroli et al., 2014; Vibe et al., 2016). This system also allowed us to monitor important parameters of NP in live animals, such as their persistence and stability in the blood circulation, interaction with host immune cells, biodistribution and dynamics of accumulation at the infection sites, the granulomas. Importantly, a number of key findings from the zebrafish model could be replicated in Mtb infected mice; in particular NP in both model systems exhibited similar accumulation in granulomas and comparable stability in the blood stream (Dal et al., 2020; Fenaroli et al., 2018).

In this study, we demonstrate the use of the zebrafish embryo to evaluate both *in vivo* toxicity and *in vivo* anti-mycobacterial efficacy of nitronaphthofuran (nNF) compounds that were previously identified to be active against Mtb in a phenotypic HTS at the Institute Pasteur in Paris (data not published). The five most promising nNF-derivatives showing potent anti-TB *in vitro* activity ( $MIC_{90} < 8 \mu\text{g/ml}$ ) were selected for this study. Since the water solubility of the selected derivatives is low ( $< 12 \mu\text{g/ml}$ ), we opted for formulating the compounds in biocompatible polymeric micelles (PM) primarily to aid their solubilization and to be able to administer therapeutic doses in the zebrafish embryo model without the use of toxic solvents. Importantly, we delivered the candidate drugs directly into the blood circulation of zebrafish embryos by intravenous injection, thereby circumventing absorption issues associated with delivery by bath immersion as used in most previously published studies. By using a set of complementary *in vivo* assays we were then able to pinpoint the most promising nNF candidates for further development in the drug discovery process.

## MATERIAL AND METHODS

### Anti-TB candidate compounds.

Nitronaphthofuran (nNF) derivatives C4, C7, C11, C12, C16 and C20 were selected from a set of 15 nNFs derivatives that were identified to be active against Mtb in a phenotypic HTS campaign at the Institute Pasteur, (Paris, France). The selection was made according to their high *in vitro* activity against Mtb ( $MIC_{90} < 8 \mu\text{g/ml}$ ), and their low (C4, C7, C11 and C12;  $CC_{50} > 65 \mu\text{g/ml}$ ) or intermediate (C20;  $CC_{50} = 9 \mu\text{g/ml}$ ) cytotoxicity in VERO cells (data not published). This resulted in a selectivity Index (SI), as calculated by the ratio of the  $CC_{50}$  to  $MIC_{90}$ , of higher than 12.5 for all compounds. The SI measures the window between cytotoxicity and anti-Mtb activity and is commonly used to evaluate the safety of new compounds for further development after initial screenings (Manjunatha and Smith, 2015; Orme, 2001). The highly cytotoxic compound C16 ( $CC_{50} = 0.3 \mu\text{g/ml}$ ), also known as R7000 (Quillardet et al., 2000), was included in the study and used as a

toxicity reference. The water solubility of all the nNF derivatives used in this study was lower than 12 µg/ml.

### **Preparation of Polymeric Micelle Drug Formulation.**

Drug-loaded polymeric micelles were prepared with the amphiphilic block copolymer pGlu(OBn)-block-pSar in combination with the appropriate compound by dual asymmetric centrifugation as described in the work of Fenaroli and colleagues (Fenaroli et al., 2018). Briefly, the amphiphilic block copolymer was mixed with the different compounds at a weight ratio specified in **Table S3** and centrifugation was performed for 30 min at 3500 rpm with a dual asymmetric centrifuge (SpeedMixer DAC 150.1 CM, Hauschild & Co.KG). The resulting slightly milky solution containing the drug loaded polymeric micelles (PM) was collected and the size of the PM was measured in 10 mM NaCl by dynamic light scattering (DLS) and the surface charge by zeta-potential analysis using a Zetasizer (Malvern Panalytical, United Kingdom).

### **Bacterial cultures**

*M. marinum* wild type M strain (Mm) and M strain expressing dsRed (Mm-dsRed) were obtained from Dr. Monica Hagedorn, Bernhard Nocht Institute for Tropical Medicine, Hamburg, Germany. Mm-dsRed expresses the recombinant fluorescent protein dsRed under the MSP12 promoter and carries a Kanamycin resistance cassette. Both Mm strains were grown in Middlebrook 7H9 broth (BD Biosciences, Heidelberg, Germany) supplemented with 10% ADC (Albumin-Dextrose-Catalase) and 0.05 % Tyloxapol (referred to as complete 7H9 medium) at 31.5 °C in the dark without agitation. Kanamycin (25 µg/ml; Sigma Aldrich) was added to the culture media of Mm-dsRed.

### **Determination of the Minimum Inhibitory Concentration (MIC<sub>90</sub>) of nNF derivatives in *M. marinum***

The MIC<sub>90</sub> for nNF-derivatives was determined using the Resazurin Microtiter Assay (REMA) adapted from Franzblau et al. (Franzblau et al., 1998). Briefly, two-fold serial dilutions of nNF-compounds in a concentration range of 16 µg/ml to 0.008 µg/ml were prepared in sterile 96-well plates using Middlebrook 7H9 broth supplemented with 10% OADC (Oleic acid-Albumin-Dextrose-Catalase). The final concentration of DMSO was kept below 1% in each well. For inoculation, 1-3 x 10<sup>3</sup> bacteria were added to each well and plates were incubated in sealed plastic bags at 31.5 °C for 72h. Then, Resazurin sodium salt (Sigma Aldrich) at a final concentration of 0.003% was added and plates were incubated for additional 48 hours. Finally, fluorescence was measured at an excitation wavelength of 535 nm and emission wavelength of 590 nm using a microplate reader (Synergy H1,

BioTek). The MIC<sub>90</sub> was defined as the lowest concentration at which the fluorescence value was equal or lower than 10% of the value for the untreated control.

### **Isolation of Bone Marrow-Derived Macrophages (BMDM)**

Wild-type C57BL/6 (WT) mice were purchased from Janvier Labs (Le Genest-Saint-Isle, France). Bone marrow derived macrophages were prepared as described previously (Speth et al., 2017). Briefly, bone marrow was flushed from the tibias and femurs of 8–12 week old mice and red blood cells were removed by incubation in RBC lysis buffer (Sigma). Bone marrow cells were then incubated in RPMI medium/10% FCS supplemented with 30% L929 conditioned medium in non-tissue culture treated dishes at 37 °C in a humidified atmosphere containing 5% CO<sub>2</sub> for 7 days with medium changes after 3 and 6 days. Differentiated BMDM were harvested, frozen and stored at -80 °C until use. Throughout experiments, BMDM were maintained in RPMI medium/10% FCS supplemented with 10% L929-conditioned medium (complete BMDM-medium).

### **Anti-mycobacterial efficacy of nNF-derivatives in *M. marinum* infected BMDM**

BMDM were seeded in 48 well plates at  $1.2 \times 10^5$  cells per well in complete BMDM-medium and incubated at 32.5°C in a humidified atmosphere containing 5% CO<sub>2</sub> overnight. Mid-log phase Mm cultures were washed 3 times with PBS/0.05% Tyloxapol, sonicated in a bath sonicator for 10 min and passed 10 times through a 27 G needle to disrupt bacterial aggregates and to produce a single cell suspension. The bacterial suspension was then diluted in RPMI/10% FCS and used to infect BMDM cultures at a MOI of 0.1 for 3h at 32.5 °C, which is within the optimal growth temperature range of Mm and is well-tolerated by mouse macrophages (Carlsson et al., 2010; Ramakrishnan and Falkow, 1994; Stamm et al., 2003). BMDM cultures were washed 3 times with pre-warmed PBS and incubated in complete BMDM medium containing 100 µg/ml Amikacin for 1 h to kill remaining extracellular bacteria. After one wash with pre-warmed PBS, infected BMDM were incubated in complete BMDM medium for additional 24 h at 32.5 °C. Then, nNF-derivatives were added to the infected BMDM at concentrations in the range of 0.125 to 32-times their respective MIC<sub>90</sub> and BMDM cultures were incubated for 3 days at 32.5 °C. The final concentration of DMSO was kept at 1% for all groups and BMDM incubated with 1% DMSO in BMDM medium were used as negative control. After 72 h of nNF treatment, BMDM were washed with pre-warmed PBS and lysed in 0.005% SDS. Viable intracellular bacteria were quantified by performing serial dilutions of the lysates and plating on Middlebrook 7H10 agar plates supplemented with 10% OADC. Plates were incubated at 31.5 °C up to 10 days before colony forming units (CFUs) were counted.

## Zebrafish Embryo Husbandry

WT zebrafish embryos were obtained from the zebrafish facility at the Faculty of Medicine, University of Oslo and at the Norwegian University of Life Sciences, Oslo, Norway. Zebrafish embryos were kept at 28.5 °C in embryo water supplemented with 0.003% phenylthiourea (Sigma Aldrich) to inhibit melanization and water was changed daily for the duration of the experiment. Experiments using zebrafish embryos and larvae were conducted in agreement with the provisions enforced by the national animal research authority at the Norwegian Food Safety Authority (Mattilsynet).

## Microinjection of the zebrafish embryo in the posterior caudal vein (PCV)

Microinjections in the PCV of zebrafish embryos were performed as described previously (Fenaroli et al., 2014). Briefly, borosilicate microneedles (GC100T-10, Harvard Instruments) were prepared using a pipet puller (P-97, Sutter Instruments) and backfilled with a solution containing *Mm* for infection or PM-formulated nNF derivatives for treatment. Zebrafish embryos were sedated by immersion in embryo water supplemented with 0.02% tricaine (Finquel) and placed on a plate containing 2% agarose. Injections were conducted under a stereomicroscope (Leica DFC365FX) using a micromanipulator (Narishige MN-153) and a microinjector pump (Eppendorf Femtojet Express pump). Drug doses [mg/kg] were calculated based on an assumed weight of app. 1 mg for zebrafish embryos at 2-3 days post-fertilization (dpf) (Fenaroli et al., 2014; Hu et al., 2000; Vibe et al., 2016).

## *In vivo* toxicity assays in zebrafish larvae

Zebrafish embryos received different doses of PM-formulated nNF-derivatives by PCV microinjection at 2 dpf and mortality was recorded twice a day until 8 days post treatment (dpt). Dead or dying embryos were recorded, removed and euthanized if necessary.

*In vivo* toxicity of PM-formulated nNF-derivatives causing low mortality was evaluated in more detail by establishing a toxicity score in individual larvae based on morphological and physiological indicators of toxicity as described previously (Palha et al., 2013; Vibe et al., 2016). Indicators of toxicity and their criteria for scoring drug toxicity are summarized in **Table 1**. For this screening zebrafish embryos were microinjected at 2 dpf with the highest dose (50 mg/kg) of PM-formulated nNF-derivatives or PBS as negative control and were analyzed at day 4 post treatment. For each indicator, a value of 1 was assigned if signs of toxicity were present, and a value of 0 if absent. The toxicity score for individual larvae was then calculated as the sum of the values assigned to the toxicity indicators with a maximal possible value of 7.



### ***In vivo efficacy assays in zebrafish larvae.***

Zebrafish embryos at 2 dpf post-fertilization were infected by injecting approximately 500 CFU (5 nL of  $10^8$  CFU/mL) of Mm-dsRed in the PCV. The embryos were allowed to recover for 24 h before receiving different treatment formulations by PCV injection. Different doses were administered by adjusting the injected volume or by different dilutions of the treatment formulation.

*Zebrafish survival study.* Zebrafish embryos were checked 1 h after the treatment injection and only alive and healthy fish were included in the experiment. Survival of embryos was recorded daily for all groups at the same time and dead embryos or embryos at the humane endpoint were removed and euthanized if necessary. The humane endpoint was defined by the presence of one or more of the following criteria: a heartbeat below 50 beats per minute, the presence of more than one edema and a severely malformed body shape.

*Determination of bacterial burden by fluorescent pixel count (FPC).* Mm-infected zebrafish embryos were imaged on day 4 post treatment using a Leica DFC365FX stereomicroscope with a 1.0X planapo lens obtaining images of the whole fish (30X magnification). The FPC for each individual embryo was quantified using a customized macro in ImageJ (NIH), which is accessible at [https://github.com/wohlmann/ZF\\_FPC](https://github.com/wohlmann/ZF_FPC). Briefly, background noise and auto fluorescence was removed by applying a lower threshold filter and the total fluorescence of Mm-dsRed in individual embryos was calculated as the sum of pixel fluorescence intensity values.

*Determination of bacterial burden by plate reader assay and Colony Forming Unit (CFU) enumeration.* At 4 days post treatment, zebrafish embryos were euthanized by an overdose with tricaine (3 mg/ml) and carefully rinsed in PBS. Between 10 and 15 larvae in a volume of 500  $\mu$ l were transferred into a lysing matrix tube containing 1.4 mm ceramic spheres (MP Biomedical). Homogenization was performed using a FastPrep FP120 cell disrupter (Therma; settings: Speed= 4, Time= 10 sec) and homogenates were placed on ice for 5 min.

For the plate reader assay, 100  $\mu$ l of the homogenate was transferred to a black 96 well plate and fluorescence was measured at an absorption wavelength of 550 nm and emission wavelength of 583 nm using a microplate reader (Synergy H1, BioTek).

For CFU plating, the homogenate was transferred to a microcentrifugation tube and passed 10 times through a 27 G needle to disrupt mycobacterial clumps. Then, NaOH was added to a final concentration of 1 % and incubated at RT for 10 min before serial dilutions in PBS were plated on 7H10/10% OADC agar plates containing 10  $\mu$ g/ml Amphotericin B and 25  $\mu$ g/ml Kanamycin A. Plates were incubated at 31.5 °C for up to 14 days before CFUs were enumerated.



## Statistics

All statistical analysis was done using GraphPad Prism 8 (GraphPad Software, San Diego, CA, USA). Normality of data distribution for control and treatment groups was tested using the D'Agostino-Pearson normality test. In the toxicity score and FPC experiments, treatment groups were compared to the control group using the non-parametric Kruskal Wallis H test followed by post hoc analysis using Dunn's multiple comparisons test. The effect of treatment on survival of Mm infected zebrafish embryos was analysed using a log-rank test of the Kaplan–Meier estimate of survival.

## RESULTS

In this study we made use of the zebrafish embryo model to evaluate the *in vivo* toxicity and efficacy of new anti-TB compounds, which were initially identified in a previous phenotypic high throughput screening at the Institute Pasteur (Paris, France). The strategy and methods we used are summarized in **Fig. 1** and included *in vitro* cell culture based assays as well as several complementary assays for *in vivo* toxicity and efficacy in the zebrafish embryo.

### ***In vitro* activity of nitronaphthofuran (nNF) -derivatives against extracellular and intracellular *M. marinum***

Since we aimed to evaluate the *in vivo* efficacy of these compounds in the zebrafish TB model using Mm, we first assessed their activity against extracellular Mm in a MIC assay. We tested 5 novel nNF-derivatives, whose molecular structure are characterized by a furan ring bearing a nitro group (**Fig. 2A**). All of them were found to be potent against extracellular Mm with MIC<sub>90</sub> values ranging from 0.016 to 0.5 µg/ml (**Fig. 2B**). To test their activity against intracellular Mm, we treated Mm infected mouse bone marrow-derived macrophages (BMDM) with the nNF compounds and the established anti-TB drug Rifampicin (RIF) and enumerated intracellular bacteria by CFU. At the tested concentration range - from 0.125 to 32-times the corresponding MIC<sub>90</sub> - none of the nNF compounds showed cytotoxic effects in BMDM cultures (**Fig. S1**). With the exception of C20 and RIF, all compounds showed significant efficacy against intracellular Mm with a 2-4 log reduction in bacterial burden at 2-times the MIC<sub>90</sub> (**Fig. 2C**). Higher concentrations (8-times the MIC<sub>90</sub>) resulted in almost complete eradication of intracellular Mm, with no detectable bacterial colonies in the case of C7 and C12. Compound C20, despite being highly effective against extracellular Mm, showed relatively low efficacy against intracellular Mm within the studied concentration range. In general, compounds C4, C7, C11 and C12 showed comparable activity against intracellular and extracellular Mm with an IC<sub>90</sub>

(90% inhibitory concentration) against intracellular bacteria lower or equivalent to their respective MIC<sub>90</sub> (**Table S1**). In contrast, C20 and RIF showed significantly lower activity against intracellular Mm, with a 26- and 9-times higher IC<sub>90</sub> than their MIC<sub>90</sub>, respectively.

### **Formulation of nNF-derivatives and RIF in polymeric micelles (PM).**

The low water solubility of the selected nNF-derivatives (predicted to be between 0.6 and 12 µg/ml) did not allow us to inject therapeutic doses without the use of toxic concentrations of solvents such as DMSO (data not shown). Therefore, in order to evaluate them in the zebrafish embryo, we opted to encapsulate the nNF-derivatives in biocompatible and biodegradable polypept(o)ide block copolymer (pGlu(OBn)-block-pSar) using dual asymmetric centrifugation. This produced drug-encapsulated polymeric micelles (PM) with a size (diameter) between 84 to 149 nm, a narrow size distribution (PDI ≤ 0.15) and slightly negative surface charge ranging from -3.7 mV to -2.5 mV as measured by zeta-potential (**Table S2**). By employing this strategy, we were able to significantly increase compound solubility and therefore to inject zebrafish embryos with the candidate compounds in a therapeutic dose range, avoiding the use of toxic solvents.

### ***In vivo* toxicity of PM formulated nNF-derivatives in the zebrafish embryo.**

The *in vivo* toxicity of the PM-formulated compounds was tested in zebrafish embryos using a mortality assay after injection of different doses into the posterior caudal vein (PCV). As expected, PM-C16 was highly toxic and induced significant mortality at the lowest administered dose (5 mg/kg) (**Fig. 3**). Similarly, PM-C20 and PM-C4 showed significant toxicity in zebrafish embryos, causing more than 50% of mortality at concentrations of 10 and 20 mg/kg respectively, and 100% mortality at 50mg/kg. Both PM-C4 and PM-C20 were therefore excluded from subsequent analysis. In contrast, PM-C7, PM-C11 and PM-C12 showed low levels of toxicity with mortality not exceeding 16% at the highest dose tested (50 mg/kg). Unloaded PM by themselves had no toxic effects and did not induce mortality in injected zebrafish embryos (**Fig. S2**).

To determine whether the selected compounds PM-C7, PM-C11 and PM-C12 could induce sublethal toxicity in embryos, we set up a sensitive toxicity scoring system based on well-established physiological and behavioral toxicity indicators (**Table 1**). These features are readily observable in embryos and include malformed or curved body shape, lack of swim bladder inflation, slow or absent blood flow and formation of edemas (**Fig. 4A**). When tested at their highest dose (50 mg/kg), the three selected compounds did not cause significant higher sublethal toxic effects compared to the non-injected, or PBS-injected control embryos (**Fig. 4B**). Compound-treated groups displayed a slightly higher mean toxicity score (TS) than the mock-injected control, which was due to the higher frequency of embryos with a TS of 1, lacking an inflated swim bladder. A few cases of embryos with

a TS of 2 to 4, mainly characterized by a lack of inflated swim bladder, deficient equilibrium and reduced escape response, were also observed.

In contrast, PM-C16, included as a positive toxicity control, gave a statistically significant higher toxicity score than the PBS injected control, at a ten times lower dose (5 mg/kg). In conclusion, PM-C7, PM-C11 and PM-C12 proved to be non-toxic *in vivo*, whereas PM-C4 and PM-C20 were excluded from further analysis due to their significant toxicity.

### **Evaluation of three experimental methods to determine the bacterial burden in the zebrafish TB model.**

We initially compared three different methods for evaluating the ability of PM-formulated compounds to reduce the bacterial burden in Mm-infected embryos. Using the three methods in sequence in the same experiment allowed us to directly compare them to each other. First, bacterial burden in individual Mm-dsRed infected embryos was quantified by fluorescence pixel count (FPC) based on the total bacteria-associated fluorescence intensity. Then, embryos within the treatment groups were pooled, homogenized and the total level of bacterial fluorescence was measured using a plate reader (PR). Finally, the bacterial burden was enumerated by classical CFU plating of the homogenized embryos. Overall, the three methods produced comparable results (**Fig. 5A-C**), which was reflected in the high degree of correlation observed between them (**Fig. 5D-F**). Levels of bacterial burden obtained by CFU assay were generally lower than the two other methods and all three compounds showed a clear dose-dependent efficacy in reducing the number of intracellular bacteria.

### ***In vivo* efficacy of PM formulated nNF-derivatives in the zebrafish TB model.**

Given the excellent concordance between the three methods, we decided to use FPC to evaluate the efficacy of PM-formulated C7, C11, C12 and RIF at a broader range of doses (**Fig. 6**). All three nNF compounds reduced bacterial burden in infected fish in a dose-dependent manner, consistently showing significant reduction of bacterial levels at doses of 20 and 50 mg/kg. Compared to treatment with PM-RIF, which was highly effective at a dose of 20 mg/kg, the three tested nNF compounds achieved comparable results at 50 mg/kg, the highest dose tested. Consistent with previous reports by our group (Fenaroli et al., 2014; Trousil et al., 2019), formulation in NP slightly improved the *in vivo* efficacy of rifampicin compared to its free form as measured by bacterial burden in infected zebrafish embryos (data not shown). However, it is unknown whether this is also the case for nNF compounds since it was not possible to test their free form in the zebrafish TB model without the use of high concentrations of toxic solvents.

In a final step, we analyzed the ability of the PM-formulated compounds to improve survival in Mm infected embryos. All compounds resulted in significant improvement of survival (66%-70%) at 8 days post infection at the highest dose (50 mg/kg) (**Fig. 7**). In contrast, nearly 100% of untreated embryos succumbed to the infection at the endpoint of the survival assay. However, none of the three compounds showed efficacy comparable to PM-formulated RIF, which achieved more than 95% survival at a dose of 20 mg/kg. Unloaded PM by themselves had no therapeutic effect and did neither reduce bacterial burden nor improve survival in infected embryos (**Fig. S3**).

In summary, of the initially 6 selected nNF-derivatives, 3 compounds (C4, C16 and C20) were excluded from the study due to their toxicity *in vivo*. The remaining 3 derivatives (C7, C11 and C12) showed minimal *in vivo* toxicity, effectively reduced bacterial burden and improved survival in Mm infected zebrafish embryos.

## DISCUSSION

In the treatment of TB, the need for new antibiotics can only be described as urgent (Bandodkar et al., 2020). Phenotypic high throughput screenings (HTS) of large chemical libraries using Mtb or surrogate mycobacteria provide a powerful approach for the discovery of new compounds with anti-TB activity. Those compounds may target new molecular mechanisms in the pathogen, which is especially important for the development of new drugs for the treatment of drug-resistant TB (Wellington and Hung, 2018). On the downside, this approach tends to be biased towards identifying a high proportion of hydrophobic and less water-soluble compounds, which are often difficult to evaluate in the subsequent drug discovery process (Di et al., 2012; Keseru and Makara, 2009; Lipinski, 2000). Encapsulation of hydrophobic molecules in polymer-based nanoparticles offers a powerful solution that is well-suited for solubilizing even highly hydrophobic drugs without the use of potentially toxic excipients. In addition, encapsulation of drugs in nanoparticles has been found to reduce drug-related toxicity, and to improve pharmacokinetic characteristics and bioavailability (Kirtane et al., 2021; Melariri et al., 2015; Vibe et al., 2016). There exists a plethora of nanoparticles for drug delivery, ranging from inorganic to lipid-based and polymeric NP, which can display a wide range of characteristics and functionalities (Griffiths et al., 2010; Mitchell et al., 2021). NP are increasingly explored as a substitute for conventional pharmaceutical methods for enhancing drug solubility such as dry or wet milling, the use of surfactants or solid dispersion preparation. Both lipid-based liposomes and polymer-based NP such as solid Poly-lactic-co-glycolic acid (PLGA) NP and polymeric micelles (PM) have been found to be suitable for the delivery of anti-TB drugs (Grotz et al., 2018). In this study, we have formulated a set of poorly water-soluble nitronaphthofuran (nNF) compounds with potent anti-TB activity in polymeric micelles (PM) in order to enhance their

solubility, and evaluated their *in vivo* toxicity and anti-mycobacterial efficacy in the zebrafish embryo model. Nitronaphthofurans are aromatic molecules characterized by a nitro group attached to an aromatic ring, a chemical structure they have in common with clinical approved antibiotics such as nitrofurans like Nifurtimox and the new-generation TB drugs delamanid and pretomanid (Rice et al., 2021). These antibiotics are prodrugs that require bioactivation by specific microbial nitroreductases, leading to the release of the highly reactive radical nitric oxide (NO) and subsequent damage of microbial DNA, lipids and proteins (Gurumurthy et al., 2012; Hall et al., 2011; Patterson and Fairlamb, 2019; Singh et al., 2008). Whether the activity of nNF compounds against Mtb is based on a similar mode of action is currently being investigated by our group.

It is increasingly recognized that the zebrafish embryo model is a valuable tool for evaluating both *in vivo* toxicity and efficacy of new drug candidates, thereby bridging the gap between *in vitro* assays and laborious mammalian *in vivo* studies in the drug discovery process (MacRae and Peterson, 2015). Low space requirements and costs for husbandry, their small size, high fecundity and rapid development makes the zebrafish a very attractive model for large-scale studies on drug effects, i.e. *in vivo* toxicity and activity. In such studies, the drugs to be tested have been almost invariably administered to the embryos in the fish water by bath immersion. Although technically easy and convenient, this way of drug delivery is associated with major limitations, especially when studying poorly water-soluble drugs (Cassar et al., 2020). First, it is not possible to deliver defined doses of drugs to the embryo since the degree and route of drug absorption e.g. via skin, gills or gastrointestinal tract is mostly unknown. Second, compounds with low water solubility may be difficult to test at all, or at concentrations high enough to achieve therapeutic concentrations in the embryo. Ordas and colleagues have addressed this problem by quantifying the amount of the adsorbed anti-TB drugs in the yolk of bath immersion treated embryos by mass spectrometry and indirectly relating that value to the observed therapeutic activity in the zebrafish TB model (Ordas et al., 2015). They found that the degree of uptake was positively correlated to the lipophilicity of the drugs, which also affected the efficacy of the drugs in the zebrafish embryo TB model.

In contrast, in our study we directly administered candidate drugs to the zebrafish embryos by intravenous injection after encapsulation in NP, thereby avoiding the above-mentioned issues associated with administration by bath immersion. This approach enabled us to administer precise and reproducible doses of lipophilic compounds with low water-solubility, which otherwise would have been difficult to test in the zebrafish larvae. Although in principle possible, the administration of NP-formulated drugs by bath immersion would face the same issues i.e. unclear route and degree of drug uptake in the embryos, thus making such experiments generally difficult to interpret. Additionally, drug administration by intravenous injection requires only minimal amounts of compounds, which is especially advantageous when these are used directly from chemical libraries and are only available in limited amounts. Specifically, only a few milligrams are needed to test compounds in the zebrafish

embryo and the result can facilitate the decision to resynthesize a specific compound in larger amounts for testing in mammalian *in vivo* models.

The zebrafish embryo is one of the most sensitive and rapid monitors of drug toxicity and is widely used to study adverse drug effects (Cassar et al., 2020). It provides valuable and rapidly obtainable information about the *in vivo* toxicity of compounds, and can be used to screen for and subsequently eliminate toxic compounds early in the drug discovery process. However, in many studies, drug toxicity is still tested exclusively in *in vitro* cell culture systems, which does not allow a reliable extrapolation of drug toxicity to the *in vivo* situation. Our data here provide a clear example of this problem; while the nNF-compound C4 showed minimal toxicity in the cell-based *in vitro* assay, it was highly toxic in the zebrafish embryo as seen in the mortality assay.

In addition to the mortality assay, which allowed us to identify two of the tested compounds (C4, and C20) as being significantly toxic *in vivo*, we have further defined a simplified toxicity score system in the zebrafish embryo based on previously published (Palha et al., 2013; Vibe et al., 2016). Using this sensitive toxicity scoring system, we could more definitively confirm the low *in vivo* toxicity of the compounds C7, C11 and C12 at the maximum concentration tested (50 mg/kg). Our toxicity score system is uncomplicated and can be further extended and refined depending on the purposes of the screening by including additional toxicity indicators. Numerous downstream assays have been developed in the zebrafish embryo to study tissue-specific toxic effects and mechanisms including cardiovascular, neuro- and behavioral toxicity and genotoxicity (Cassar et al., 2020; Chakravarthy et al., 2014; Kosmehl et al., 2006). For example, the neurotoxicity of a broad range of drugs has been assessed by studying their effects on the locomotor activity of zebrafish larvae in repeated dark/light cycles (Basnet et al., 2017; Basnet et al., 2019). Cardiotoxicity can readily be evaluated since drug-induced bradycardia in the zebrafish embryo was shown to correlate well with QT-prolongation in humans (Milan et al., 2003). Importantly, findings from toxicity studies in the zebrafish embryo have been shown to generally correlate well with those obtained in rodent models such as mice and rats (Ali et al., 2011; Ducharme et al., 2015; Vorhees et al., 2021).

Of relevance here, the zebrafish embryo is an especially well-established model to study tuberculosis (Cronan and Tobin, 2014). Its success has spurred efforts by several research groups to use this model system for the evaluation of the *in vivo* efficacy of new anti-TB drugs. Both clinically approved drugs such as rifampicin, isoniazid and ethambutol, as well as new drug candidates against TB have been tested in the zebrafish embryo, in part by the use of automated injection and imaging platforms (Dalton et al., 2017; Makarov et al., 2014; Ordas et al., 2015; Takaki et al., 2012). The therapeutic efficacy of anti-TB drugs in the zebrafish TB model is usually scored either by quantifying survival of Mm infected embryos or by assessing bacterial burden by the fluorescent pixel count method (FPC), exploiting the transparent nature of the zebrafish in conjunction with fluorescent Mm strains. It is generally accepted that FPC is a good measure of the bacterial burden in Mm infected zebrafish



(Stirling et al., 2020). However, this approach has rarely been directly compared to other methods, in particular CFU enumeration, that is commonly considered to be the gold standard for quantifying bacterial burden in mammalian models of TB (Gumbo et al., 2015).

CFU-plating of homogenized whole zebrafish embryos has proven to be quite troublesome because of the high incidence of microbial contamination, most likely due to the presence of commensal bacteria in the gut of the zebrafish larvae and microbial organisms in the surrounding water (Bates et al., 2006; Rawls et al., 2004). Here, we succeeded in establishing a quick and reliable protocol for a quantitative CFU assay in Mm infected zebrafish embryos, which successfully addresses this issue. The most critical steps in our protocol are (i) the incubation of the homogenate with 1% NaOH for 10 min, which effectively eliminates bacterial contamination without affecting Mm viability, (ii) the supplementation of the CFU-agar plates with amphotericin B -to prevent fungal growth- and kanamycin -taking advantage of the reporter plasmids carrying a kanamycin resistance cassette- as selective antimicrobials, and (iii) the dissociation of bacterial aggregates by passaging the homogenate through a 27-gauge needle. When we directly compared the estimation of bacterial burden by CFU versus two fluorescence-based methods (FPC and Plate reader), we found excellent concordance in the inhibitory activity of the tested drugs between these three methods. In contrast to CFU plating, which detects viable bacteria, fluorescence-based assays may not distinguish between dead and viable bacteria as fluorescent proteins such as dsRed can remain stable for several hours in bacteria, even after they are killed ((Blokpoel et al., 2003) and our own observation). In contrast, CFU plating might not detect mycobacterial subpopulations, which are viable but grow poorly on solid agar medium (de Knecht et al., 2017; Hu et al., 2015). These two observations may explain the generally higher reduction in bacterial burden seen after drug treatment observed in CFUs compared to FPC or the plate reader assay. Therefore, using both CFU and FPC together could represent an ideal experimental combination to improve the accuracy of drug efficacy evaluation in the zebrafish TB embryo model by counterbalancing the drawbacks of the two assays. However, FPC is, in contrast to the classical CFU assay, a non-invasive method that allows one to conduct other assays such as survival assays in parallel and therefore often remains the preferred method.

In our study, we have combined several complementary assays in the zebrafish TB model to identify the best compound candidates from a previous drug whole cell screening in terms of their anti-mycobacterial potency *in vivo*. The nNF compounds C7, C11 and C12 significantly reduced the bacterial burden in infected zebrafish and improved their survival with minimal toxic effects. These results pinpoint the aforementioned compounds as the most promising candidates for further development and *in vivo* testing in the conventional mouse TB model.

In conclusion, the zebrafish embryo can fill a void in the preclinical evaluation of new TB drug candidates by bridging the gap between *in vitro* studies in bacterial or mammalian cell cultures and time- and cost-intensive *in vivo* studies in mammalian TB models. In a time frame of less than two weeks, the zebrafish embryo model can provide valuable information about both the *in vivo* toxicity



and efficacy of anti-TB candidate drugs and thus facilitate the identification of the most promising candidate drugs for further evaluation. The use of nanoparticle technology enables the evaluation of even poorly water-soluble drugs *in vivo*, which otherwise would be difficult to study. Last, but not least, the use of the zebrafish embryo satisfies the desirable principles of Reduce, Replace and Refine (3R's) for animal studies (NC3Rs, 2021). *In vivo* studies in the zebrafish embryo can efficiently eliminate compounds with significant *in vivo* toxicity and provide important information about the toxic or therapeutic dose range of anti-TB compounds. This, in turn can contribute to refine experiments in higher vertebrates like mice and rats and to reduce the number of animals needed at a later stage in the drug discovery process.

**ACKNOWLEDGEMENTS:** This work was supported by the European Seventh Framework Program Nanotherapeutics against Resistant Emerging Bacterial Pathogens (NAREB Project 604237), the European Union's Horizon 2020 research and innovation program under the Marie Skłodowska-Curie grant agreement n° 609020 and the Norwegian Research Council (Project n° 275873 and 273319).

## REFERENCES

- Ali, S., van Mil, H. G. and Richardson, M. K. (2011). Large-scale assessment of the zebrafish embryo as a possible predictive model in toxicity testing. *PLoS One* **6**, e21076.
- Andreu, N., Zelmer, A., Sampson, S. L., Ikeh, M., Bancroft, G. J., Schaible, U. E., Wiles, S. and Robertson, B. D. (2013). Rapid *in vivo* assessment of drug efficacy against Mycobacterium tuberculosis using an improved firefly luciferase. *J Antimicrob Chemother* **68**, 2118-27.
- Balganesh, T. S., Balasubramanian, V. and Kumar, S. A. (2004). Drug discovery for tuberculosis: Bottlenecks and path forward. *Current Science* **86**, 167-176.
- Bandodkar, B., Shandil, R. K., Bhat, J. and Balganesh, T. S. (2020). Two Decades of TB Drug Discovery Efforts-What Have We Learned? *Applied Sciences* **10**, 5704.
- Basnet, R. M., Guarienti, M. and Memo, M. (2017). Zebrafish Embryo as an *In Vivo* Model for Behavioral and Pharmacological Characterization of Methylxanthine Drugs. *Int J Mol Sci* **18**, 596.
- Basnet, R. M., Zizioli, D., Taweedet, S., Finazzi, D. and Memo, M. (2019). Zebrafish Larvae as a Behavioral Model in Neuropharmacology. *Biomedicines* **7**, 23.
- Bates, J. M., Mittge, E., Kuhlman, J., Baden, K. N., Cheesman, S. E. and Guillemin, K. (2006). Distinct signals from the microbiota promote different aspects of zebrafish gut differentiation. *Dev Biol* **297**, 374-86.
- Blokpoel, M. C., O'Toole, R., Smeulders, M. J. and Williams, H. D. (2003). Development and application of unstable GFP variants to kinetic studies of mycobacterial gene expression. *J Microbiol Methods* **54**, 203-11.
- Carlsson, F., Kim, J., Dumitru, C., Barck, K. H., Carano, R. A., Sun, M., Diehl, L. and Brown, E. J. (2010). Host-detrimental role of Esx-1-mediated inflammasome activation in mycobacterial infection. *PLoS Pathog* **6**, e1000895.
- Carvalho, R., de Sonnevile, J., Stockhammer, O. W., Savage, N. D., Veneman, W. J., Ottenhoff, T. H., Dirks, R. P., Meijer, A. H. and Spaink, H. P. (2011). A high-throughput screen for tuberculosis progression. *PLoS One* **6**, e16779.

**Cassar, S., Adatto, I., Freeman, J. L., Gamse, J. T., Iturria, I., Lawrence, C., Muriana, A., Peterson, R. T., Van Cruchten, S. and Zon, L. I.** (2020). Use of Zebrafish in Drug Discovery Toxicology. *Chem Res Toxicol* **33**, 95-118.

**Chakravarthy, S., Sadagopan, S., Nair, A. and Sukumaran, S. K.** (2014). Zebrafish as an in vivo high-throughput model for genotoxicity. *Zebrafish* **11**, 154-66.

**Cornet, C., Calzolari, S., Minana-Prieto, R., Dyballa, S., van Doornmalen, E., Rutjes, H., Savy, T., D'Amico, D. and Terriente, J.** (2017). ZeGlobalTox: An Innovative Approach to Address Organ Drug Toxicity Using Zebrafish. *Int J Mol Sci* **18**, 864.

**Cronan, M. R. and Tobin, D. M.** (2014). Fit for consumption: zebrafish as a model for tuberculosis. *Disease Models & Mechanisms* **7**, 777-784.

**Dal, N. K., Kocere, A., Wohlmann, J., Van Herck, S., Bauer, T. A., Resseguier, J., Bagherifam, S., Hyldmo, H., Barz, M., De Geest, B. G. et al.** (2020). Zebrafish Embryos Allow Prediction of Nanoparticle Circulation Times in Mice and Facilitate Quantification of Nanoparticle-Cell Interactions. *Small* **16**, e1906719.

**Dalton, J. P., Uy, B., Okuda, K. S., Hall, C. J., Denny, W. A., Crosier, P. S., Swift, S. and Wiles, S.** (2017). Screening of anti-mycobacterial compounds in a naturally infected zebrafish larvae model. *J Antimicrob Chemother* **72**, 421-427.

**Davis, J. M., Clay, H., Lewis, J. L., Ghori, N., Herbolme, P. and Ramakrishnan, L.** (2002). Real-time visualization of mycobacterium-macrophage interactions leading to initiation of granuloma formation in zebrafish embryos. *Immunity* **17**, 693-702.

**de Knecht, G. J., Dickinson, L., Pertinez, H., Evangelopoulos, D., McHugh, T. D., Bakker-Woudenberg, I., Davies, G. R. and de Steenwinkel, J. E. M.** (2017). Assessment of treatment response by colony forming units, time to culture positivity and the molecular bacterial load assay compared in a mouse tuberculosis model. *Tuberculosis (Edinb)* **105**, 113-118.

**Di, L., Fish, P. V. and Mano, T.** (2012). Bridging solubility between drug discovery and development. *Drug Discov Today* **17**, 486-95.

**Ducharme, N. A., Reif, D. M., Gustafsson, J.-A. and Bondesson, M.** (2015). Comparison of toxicity values across zebrafish early life stages and mammalian studies: Implications for chemical testing. *Reproductive Toxicology* **55**, 3-10.

**Dyballa, S., Minana, R., Rubio-Brotons, M., Cornet, C., Pederzani, T., Escaramis, G., Garcia-Serna, R., Mestres, J. and Terriente, J.** (2019). Comparison of zebrafish larvae and hiPSC cardiomyocytes for predicting drug induced cardiotoxicity in humans. *Toxicol Sci* **171**, 283-295.

**Fenaroli, F., Repnik, U., Xu, Y., Johann, K., Van Herck, S., Dey, P., Skjeldal, F. M., Frei, D. M., Bagherifam, S., Kocere, A. et al.** (2018). Enhanced Permeability and Retention-like Extravasation of Nanoparticles from the Vasculature into Tuberculosis Granulomas in Zebrafish and Mouse Models. *ACS Nano* **12**, 8646-8661.

**Fenaroli, F., Westmoreland, D., Benjaminsen, J., Kolstad, T., Skjeldal, F. M., Meijer, A. H., van der Vaart, M., Ulanova, L., Roos, N., Nystrom, B. et al.** (2014). Nanoparticles as drug delivery system against tuberculosis in zebrafish embryos: direct visualization and treatment. *ACS Nano* **8**, 7014-26.

**Franzblau, S. G., Witzig, R. S., McLaughlin, J. C., Torres, P., Madico, G., Hernandez, A., Degnan, M. T., Cook, M. B., Quenzer, V. K., Ferguson, R. M. et al.** (1998). Rapid, low-technology MIC determination with clinical Mycobacterium tuberculosis isolates by using the microplate Alamar Blue assay. *J Clin Microbiol* **36**, 362-6.

**Goldman, R. C.** (2013). Why are membrane targets discovered by phenotypic screens and genome sequencing in Mycobacterium tuberculosis? *Tuberculosis (Edinb)* **93**, 569-88.

**Griffiths, G., Nystrom, B., Sable, S. B. and Khuller, G. K.** (2010). Nanobead-based interventions for the treatment and prevention of tuberculosis. *Nat Rev Microbiol* **8**, 827-34.

**Grotz, E., Tateosian, N., Amiano, N., Cagel, M., Bernabeu, E., Chiappetta, D. A. and Moretton, M. A.** (2018). Nanotechnology in Tuberculosis: State of the Art and the Challenges Ahead. *Pharm Res* **35**, 213.

- Grzelak, E. M., Choules, M. P., Gao, W., Cai, G., Wan, B., Wang, Y., McAlpine, J. B., Cheng, J., Jin, Y., Lee, H. et al.** (2019). Strategies in anti-Mycobacterium tuberculosis drug discovery based on phenotypic screening. *J Antibiot (Tokyo)* **72**, 719-728.
- Gumbo, T., Lenaerts, A. J., Hanna, D., Romero, K. and Nuermberger, E.** (2015). Nonclinical models for antituberculosis drug development: a landscape analysis. *J Infect Dis* **211 Suppl 3**, S83-95.
- Gurumurthy, M., Mukherjee, T., Dowd, C. S., Singh, R., Niyomrattanakit, P., Tay, J. A., Nayyar, A., Lee, Y. S., Cherian, J., Boshoff, H. I. et al.** (2012). Substrate specificity of the deazaflavin-dependent nitroreductase from Mycobacterium tuberculosis responsible for the bio-reductive activation of bicyclic nitroimidazoles. *FEBS J* **279**, 113-25.
- Hall, B. S., Bot, C. and Wilkinson, S. R.** (2011). Nifurtimox activation by trypanosomal type I nitroreductases generates cytotoxic nitrile metabolites. *J Biol Chem* **286**, 13088-95.
- Houben, R. M. and Dodd, P. J.** (2016). The Global Burden of Latent Tuberculosis Infection: A Re-estimation Using Mathematical Modelling. *PLoS Med* **13**, e1002152.
- Hu, N., Sedmera, D., Yost, H. J. and Clark, E. B.** (2000). Structure and function of the developing zebrafish heart. *Anat Rec* **260**, 148-57.
- Hu, Y., Liu, A., Ortega-Muro, F., Alameda-Martin, L., Mitchison, D. and Coates, A.** (2015). High-dose rifampicin kills persisters, shortens treatment duration, and reduces relapse rate in vitro and in vivo. *Front Microbiol* **6**, 641.
- Johansen, M. D., Kasparian, J. A., Hortle, E., Britton, W. J., Purdie, A. C. and Oehlers, S. H.** (2018). Mycobacterium marinum infection drives foam cell differentiation in zebrafish infection models. *Dev Comp Immunol* **88**, 169-172.
- Keseru, G. M. and Makara, G. M.** (2009). The influence of lead discovery strategies on the properties of drug candidates. *Nat Rev Drug Discov* **8**, 203-12.
- Kirtane, A. R., Verma, M., Karandikar, P., Furin, J., Langer, R. and Traverso, G.** (2021). Nanotechnology approaches for global infectious diseases. *Nat Nanotechnol* **16**, 369-384.
- Kondreddi, R. R., Jiricek, J., Rao, S. P., Lakshminarayana, S. B., Camacho, L. R., Rao, R., Herve, M., Bifani, P., Ma, N. L., Kuhen, K. et al.** (2013). Design, synthesis, and biological evaluation of indole-2-carboxamides: a promising class of antituberculosis agents. *J Med Chem* **56**, 8849-59.
- Kosmehl, T., Hallare, A. V., Reifferscheid, G., Manz, W., Braunbeck, T. and Hollert, H.** (2006). A novel contact assay for testing genotoxicity of chemicals and whole sediments in zebrafish embryos. *Environ Toxicol Chem* **25**, 2097-106.
- Lange, C., Chesov, D., Heyckendorf, J., Leung, C. C., Udawadia, Z. and Dheda, K.** (2018). Drug-resistant tuberculosis: An update on disease burden, diagnosis and treatment. *Respirology* **23**, 656-673.
- Lipinski, C. A.** (2000). Drug-like properties and the causes of poor solubility and poor permeability. *J Pharmacol Toxicol Methods* **44**, 235-49.
- Machado, D., Girardini, M., Viveiros, M. and Pieroni, M.** (2018). Challenging the Drug-Likeness Dogma for New Drug Discovery in Tuberculosis. *Front Microbiol* **9**, 1367.
- MacRae, C. A. and Peterson, R. T.** (2015). Zebrafish as tools for drug discovery. *Nature Reviews Drug Discovery* **14**, 721-731.
- Makarov, V., Lechartier, B., Zhang, M., Neres, J., van der Sar, A. M., Raadsen, S. A., Hartkoorn, R. C., Ryabova, O. B., Vocat, A., Decosterd, L. A. et al.** (2014). Towards a new combination therapy for tuberculosis with next generation benzothiazinones. *EMBO Mol Med* **6**, 372-83.
- Manjunatha, U. H. and Smith, P. W.** (2015). Perspective: Challenges and opportunities in TB drug discovery from phenotypic screening. *Bioorg Med Chem* **23**, 5087-97.
- Melariri, P., Kalombo, L., Nkuna, P., Dube, A., Hayeshi, R., Ogutu, B., Gibhard, L., deKock, C., Smith, P., Wiesner, L. et al.** (2015). Oral lipid-based nanoformulation of tafenoquine enhanced bioavailability and blood stage antimalarial efficacy and led to a reduction in human red blood cell loss in mice. *Int J Nanomedicine* **10**, 1493-503.

**Milan, D. J., Peterson, T. A., Ruskin, J. N., Peterson, R. T. and MacRae, C. A.** (2003). Drugs that induce repolarization abnormalities cause bradycardia in zebrafish. *Circulation* **107**, 1355-8.

**Mitchell, M. J., Billingsley, M. M., Haley, R. M., Wechsler, M. E., Peppas, N. A. and Langer, R.** (2021). Engineering precision nanoparticles for drug delivery. *Nat Rev Drug Discov* **20**, 101-124.

**NC3Rs.** (2021). What are the 3Rs?: National Center for the Replacement, Refinement & Reduction of Animals in Research.

**Ordas, A., Raterink, R. J., Cunningham, F., Jansen, H. J., Wiweger, M. I., Jong-Raadsen, S., Bos, S., Bates, R. H., Barros, D., Meijer, A. H. et al.** (2015). Testing tuberculosis drug efficacy in a zebrafish high-throughput translational medicine screen. *Antimicrob Agents Chemother* **59**, 753-62.

**Orme, I.** (2001). Search for new drugs for treatment of tuberculosis. *Antimicrob Agents Chemother* **45**, 1943-6.

**Palha, N., Guivel-Benhassine, F., Briolat, V., Lutfalla, G., Sourisseau, M., Ellett, F., Wang, C. H., Lieschke, G. J., Herbomel, P., Schwartz, O. et al.** (2013). Real-time whole-body visualization of Chikungunya Virus infection and host interferon response in zebrafish. *PLoS Pathog* **9**, e1003619.

**Patterson, S. and Fairlamb, A. H.** (2019). Current and Future Prospects of Nitro-compounds as Drugs for Trypanosomiasis and Leishmaniasis. *Curr Med Chem* **26**, 4454-4475.

**Quillardet, P., Michel, V., Arrault, X., Hofnung, M. and Touati, E.** (2000). Mutagenic properties of a nitrofurantoin, 7-methoxy-2-nitronaphtho[2, 1-b]furan (R7000), in lacI transgenic mice. *Mutat Res* **470**, 177-88.

**Ramakrishnan, L. and Falkow, S.** (1994). Mycobacterium marinum persists in cultured mammalian cells in a temperature-restricted fashion. *Infect Immun* **62**, 3222-9.

**Rawls, J. F., Samuel, B. S. and Gordon, J. I.** (2004). Gnotobiotic zebrafish reveal evolutionarily conserved responses to the gut microbiota. *Proc Natl Acad Sci U S A* **101**, 4596-601.

**Rice, A. M., Long, Y. and King, S. B.** (2021). Nitroaromatic Antibiotics as Nitrogen Oxide Sources. *Biomolecules* **11**, 267.

**Sharma, A., Sharma, S. and Khuller, G. K.** (2004). Lectin-functionalized poly (lactide-co-glycolide) nanoparticles as oral/aerosolized antitubercular drug carriers for treatment of tuberculosis. *J Antimicrob Chemother* **54**, 761-6.

**Singh, R., Manjunatha, U., Boshoff, H. I., Ha, Y. H., Niyomrattanakit, P., Ledwidge, R., Dowd, C. S., Lee, I. Y., Kim, P., Zhang, L. et al.** (2008). PA-824 kills nonreplicating Mycobacterium tuberculosis by intracellular NO release. *Science* **322**, 1392-5.

**Speth, M. T., Repnik, U., Muller, E., Spanier, J., Kalinke, U., Corthay, A. and Griffiths, G.** (2017). Poly(I:C)-Encapsulating Nanoparticles Enhance Innate Immune Responses to the Tuberculosis Vaccine Bacille Calmette-Guerin (BCG) via Synergistic Activation of Innate Immune Receptors. *Mol Pharm* **14**, 4098-4112.

**Stamm, L. M., Morisaki, J. H., Gao, L. Y., Jeng, R. L., McDonald, K. L., Roth, R., Takeshita, S., Heuser, J., Welch, M. D. and Brown, E. J.** (2003). Mycobacterium marinum escapes from phagosomes and is propelled by actin-based motility. *J Exp Med* **198**, 1361-8.

**Stirling, D. R., Suleyman, O., Gil, E., Elks, P. M., Torraca, V., Noursadeghi, M. and Tomlinson, G. S.** (2020). Analysis tools to quantify dissemination of pathology in zebrafish larvae. *Sci Rep* **10**, 3149.

**Takaki, K., Cosma, C. L., Troll, M. A. and Ramakrishnan, L.** (2012). An in vivo platform for rapid high-throughput antitubercular drug discovery. *Cell Rep* **2**, 175-84.

**Tarcsay, A. and Keseru, G. M.** (2013). Contributions of molecular properties to drug promiscuity. *J Med Chem* **56**, 1789-95.

**Tobin, D. M. and Ramakrishnan, L.** (2008). Comparative pathogenesis of Mycobacterium marinum and Mycobacterium tuberculosis. *Cell Microbiol* **10**, 1027-39.

**Trousil, J., Syrova, Z., Dal, N. K., Rak, D., Konefal, R., Pavlova, E., Matejkova, J., Cmarko, D., Kubickova, P., Pavlis, O. et al.** (2019). Rifampicin Nanoformulation Enhances Treatment of Tuberculosis in Zebrafish. *Biomacromolecules* **20**, 1798-1815.

**Vibe, C. B., Fenaroli, F., Pires, D., Wilson, S. R., Bogoeva, V., Kalluru, R., Speth, M., Anes, E., Griffiths, G. and Hildahl, J.** (2016). Thioridazine in PLGA nanoparticles reduces toxicity and improves rifampicin therapy against mycobacterial infection in zebrafish. *Nanotoxicology* **10**, 680-8.

**Volkman, H. E., Clay, H., Beery, D., Chang, J. C., Sherman, D. R. and Ramakrishnan, L.** (2004). Tuberculous granuloma formation is enhanced by a mycobacterium virulence determinant. *PLoS Biol* **2**, e367.

**Vorhees, C. V., Williams, M. T., Hawkey, A. B. and Levin, E. D.** (2021). Translating Neurobehavioral Toxicity Across Species From Zebrafish to Rats to Humans: Implications for Risk Assessment. *Frontiers in Toxicology* **3**.

**Waring, M. J.** (2010). Lipophilicity in drug discovery. *Expert Opin Drug Discov* **5**, 235-48.

**Wellington, S. and Hung, D. T.** (2018). The Expanding Diversity of Mycobacterium tuberculosis Drug Targets. *ACS Infect Dis* **4**, 696-714.

**World Health Organization.** (2020). Global tuberculosis report 2020. Geneva.

**Zhang, G., Truong, L., Tanguay, R. L. and Reif, D. M.** (2017). A New Statistical Approach to Characterize Chemical-Elicited Behavioral Effects in High-Throughput Studies Using Zebrafish. *PLoS One* **12**, e0169408.



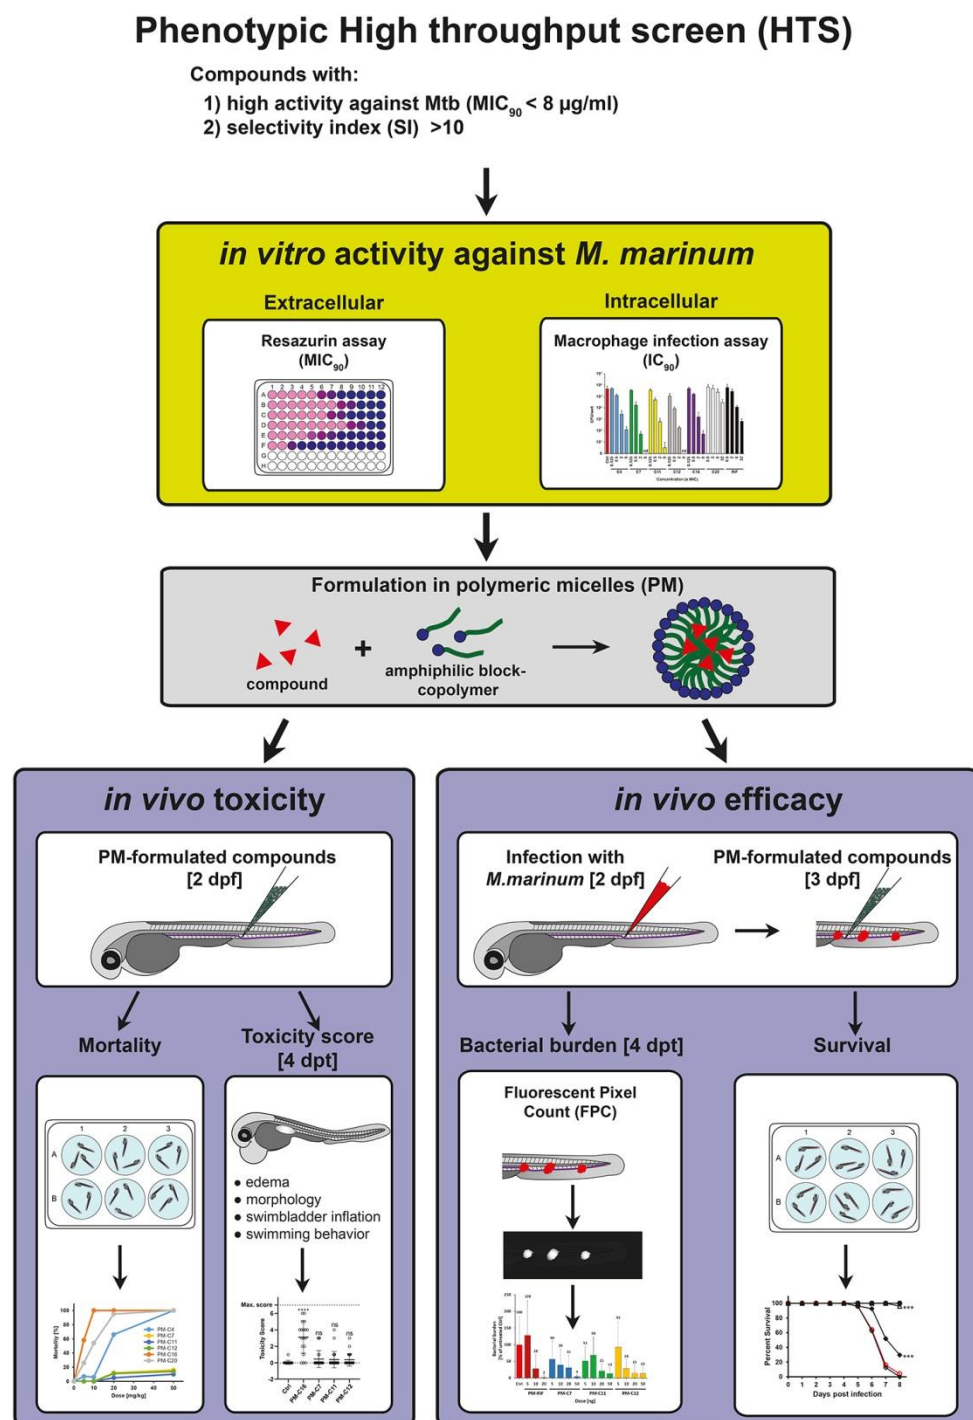

**Fig. 1. Schematic summary of the strategy used to evaluate *in vivo* toxicity and anti-mycobacterial efficacy of HTS-identified lipophilic compounds using the zebrafish embryo model.** Candidate compounds with significant anti-mycobacterial activity were identified in a phenotypic HTS campaign using chemical libraries and selected for further evaluation based on their

*in vitro* activity against Mtb (MIC<sub>90</sub>) and their selectivity index (SI >10) . Prior to *in vivo* testing in the zebrafish tuberculosis model using the fish pathogen *M. marinum*, candidate compounds were tested for their *in vitro* activity against extracellular *M. marinum* by the resazurin assay and against intracellular bacteria in mouse macrophages by the colony-forming unit (CFU) assay. Then, candidate compounds were formulated in polymeric micelles (PM) primarily to enhance solubility and to enable intravenous injection in the zebrafish embryo.

*In vivo* toxicity of PM-formulated compounds was first evaluated by mortality analysis after a single injection of different doses at 8 days post treatment (dpt) and compounds with significant toxicity were excluded from further analysis. PM-formulated compounds showing low mortality were then characterized in more detail by assigning a toxicity score to individual embryos at 4 dpt based on different morphological and physiological indicators of toxicity as outlined in materials and methods. For evaluation of *in vivo* efficacy, zebrafish embryos were infected with *M. marinum* and treated with different doses of PM-formulated compounds. Therapeutic efficacy was then assessed by bacterial burden (FPC) at 4 dpt and by survival analysis.



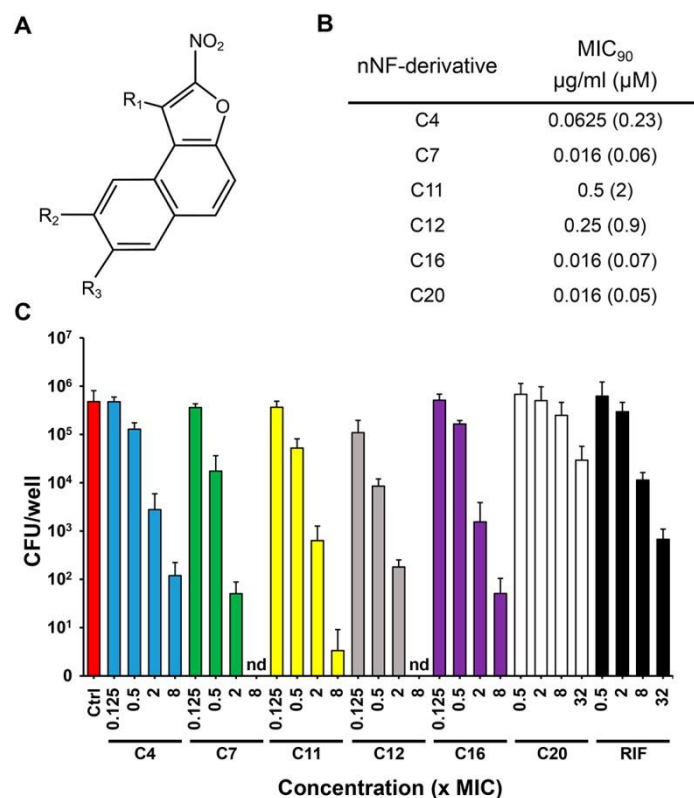

**Fig. 2. *In vitro* anti-mycobacterial activity of nNF-derivatives against extracellular and intracellular *M. marinum*.** A) The nitroaromatic backbone structure of the nNF compounds tested in this study. B) Activity of nNF-derivatives against extracellular *M. marinum* determined by MIC<sub>90</sub>. C) Anti-mycobacterial activity of nNF-derivatives and RIF against intracellular *M. marinum* in murine bone marrow-derived macrophages (BMDM). BMDM-cultures were infected with *M. marinum* at 32.5 °C at a MOI of 0.1 and treated with nNF-derivatives at different concentrations based on their MIC<sub>90</sub>. Intracellular mycobacterial burden was determined by CFU-plating at 4 days post-infection. Data represent the mean ± SD of 3 independent experiments; nd: not detected

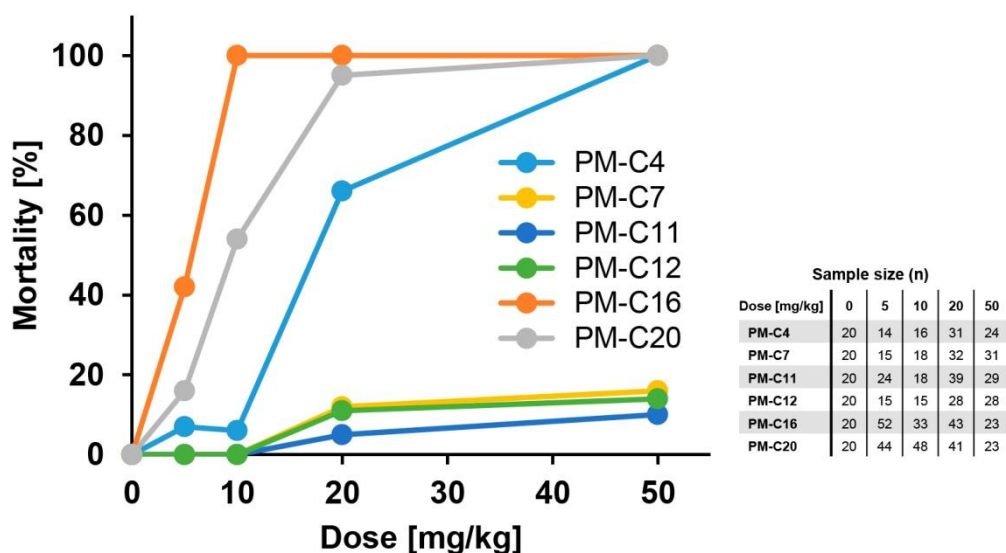

**Fig. 3. Evaluation of *in vivo* toxicity of PM-formulated nNF-derivatives in zebrafish embryos by mortality analysis.** Zebrafish embryos were treated with different doses of PM-formulated nNF-derivatives by intravenous injection and mortality was recorded at 8 days post treatment. Results are pooled from at least 3 independent experiments.

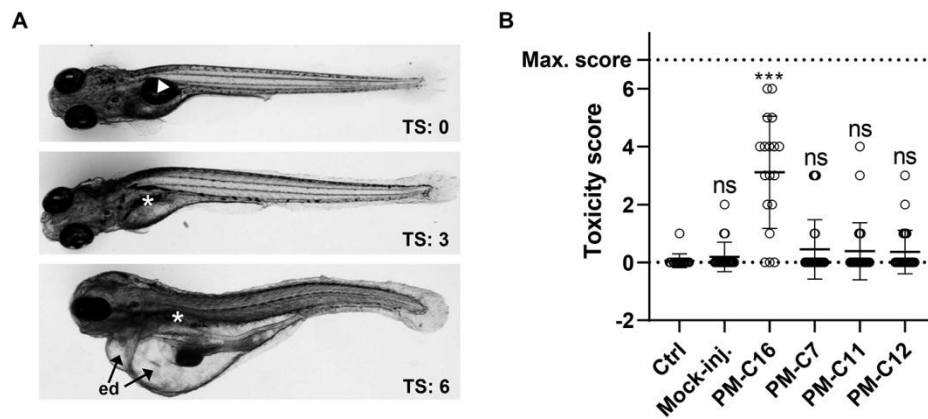

**Fig. 4. Evaluation of *in vivo* toxicity of PM-formulated nNF-derivatives in zebrafish embryos by toxicity score (TS).** Zebrafish embryos were injected with high doses (50 mg/kg) of PM-formulated C7, C11 and C12 or 5 mg/kg of PM-C16 and the toxicity score was determined at 4 days post treatment in individual embryos based on morphological and physiological indicators of toxicity as specified in **Table 1** in the Material and Methods section. (A) Representative images of embryos with different TS displaying normally inflated (arrowhead) or lack of inflated swim bladder (\*), severe edemas (ed) and abnormally curved body shape (bottom image). (B) Toxicity scores in embryos injected with PM-formulated compounds. Non-injected and mock (PBS)-injected embryos were used as negative toxicity control and embryos injected with PM-C16 as positive toxicity control. Each symbol represents the toxicity score of an individual larvae and the mean for each group is shown as horizontal line with error bars denoting the SD; (Ctrl: n=18; Mock-inj.: n=21; C16: n=18; C7: n=31; C11: n=26; C12: n=25); \*\*\*  $p < .001$ .

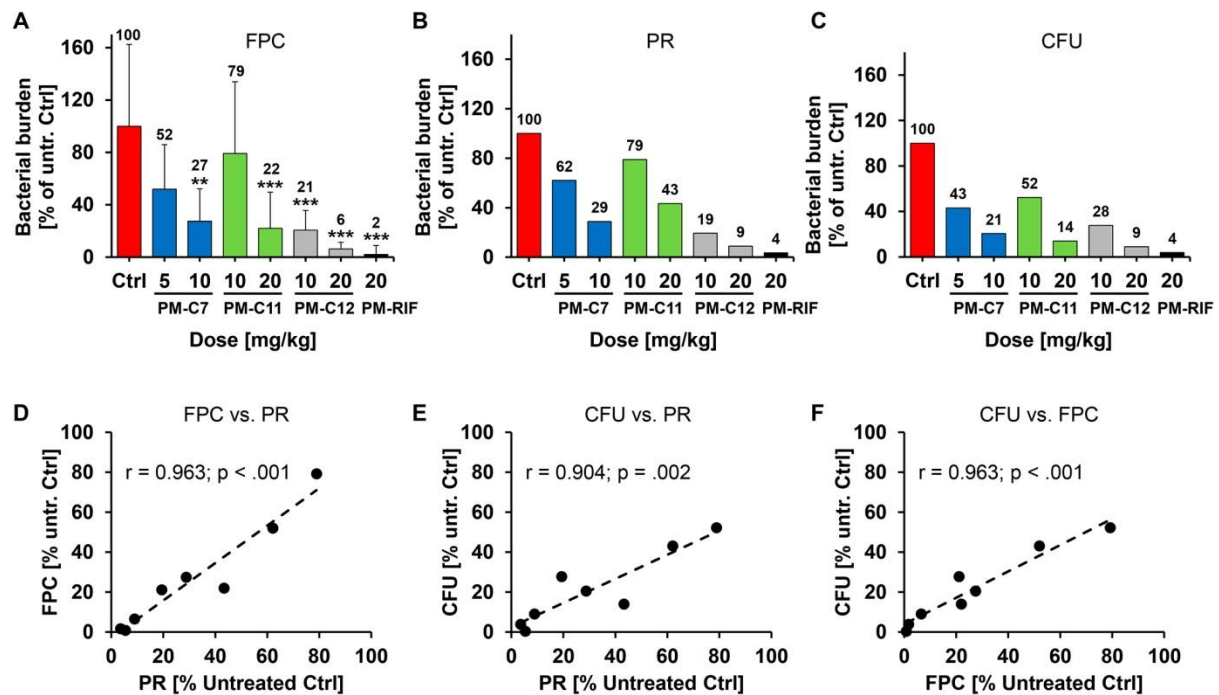

**Fig. 5. Quantification of bacterial burden in *M. marinum* infected zebrafish embryos after treatment with PM-formulated nNF-derivatives by three different methods.** *M. marinum*-dsRed infected zebrafish embryos were treated with the indicated doses of the PM-formulated nNF-derivate C7, C11, C12 or PM-formulated Rifampicin by intravenous injection and bacterial burden was quantified at 4 days post treatment by 3 different assays. (A) Fluorescent pixel count (FPC): untreated or treated embryos were imaged and the total bacterial fluorescence intensity was determined by FPC for individual embryos. Results represent the mean  $\pm$  SD of data normalized to the untreated control pooled from at least 3 independent experiments (Ctrl:  $n=71$ ; PM-C7 5 mg/kg:  $n=13$  and 10 mg/kg:  $n=15$ ; PM-C11 10 mg/kg:  $n=15$  and 20 mg/kg:  $n=18$ ; PM-C12 10 mg/kg:  $n=45$  and 20 mg/kg:  $n=49$  and PM-RIF 20 mg/ml:  $n=51$ ). The mean values of each group are displayed above the columns; \*\*  $p < .01$ ; \*\*\*  $p < .001$ . (B) Plate reader (PR) assay: embryos in each treatment group or the untreated control were pooled, homogenized and fluorescence intensity was measured using a plate reader. (C) CFU count: Bacterial burden was enumerated by plating serial dilutions of the pooled homogenate on 7H10 plates. Results in (B, C) are shown as percentage relative to the untreated control and represent data from one experiment. (D – F) Correlation between the normalized bacterial burden for all four compounds obtained by the three methods. Linear regression plots comparing (D) FPC with the PR assay, (E) CFU with the PR assay and (F) CFU with the FPC assay. Pearson's Coefficient of Correlation ( $r$ ) with  $p$  value are denoted in the individual figures.

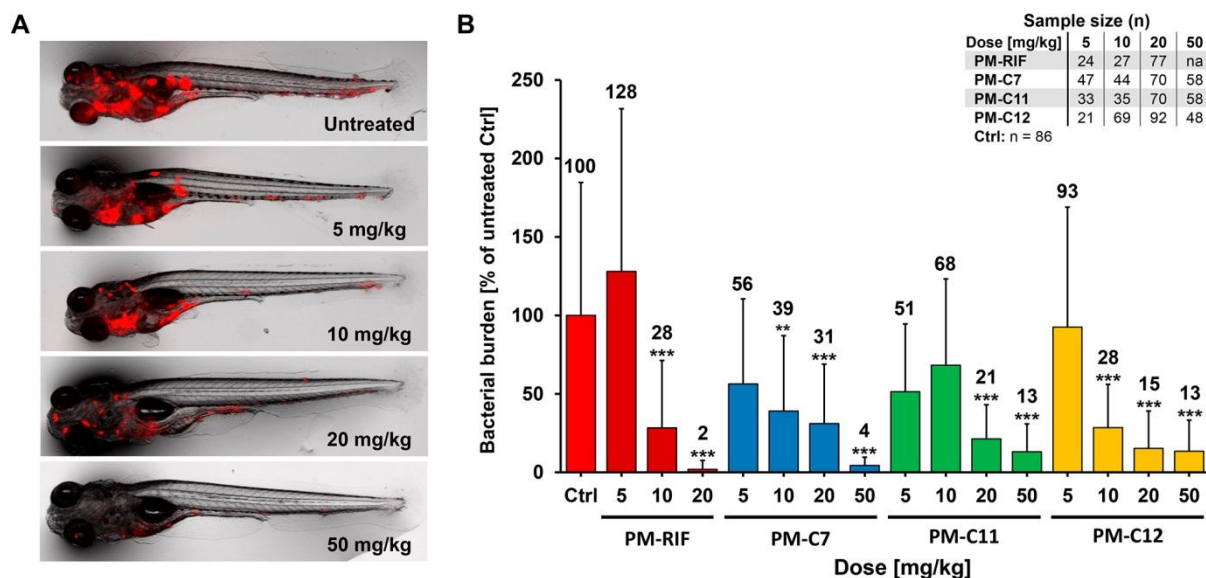

**Fig. 6. Evaluation of *in vivo* efficacy of PM-formulated nNF-derivatives in the zebrafish TB model.** Zebrafish embryos were infected with *M. marinum*-dsRed and treated with different doses of the PM-formulated nNF-derivate C7, C11, C12 or PM-formulated Rifampicin by intravenous injection. (A) Representative images of *M. marinum* infected embryos treated with different doses of PM-C7 at 4 days post treatment. (B) Quantification of bacterial burden by FPC at 4 days post treatment in embryos treated with the indicated doses of the PM-formulated compounds or RIF. FPC values of individual embryos were normalized to the untreated control group and results are presented as the mean  $\pm$  SD. Results are pooled from at least 3 independent experiments. The mean values of each group are displayed above the columns; na: not applicable; \*\*\*  $p < .001$ .

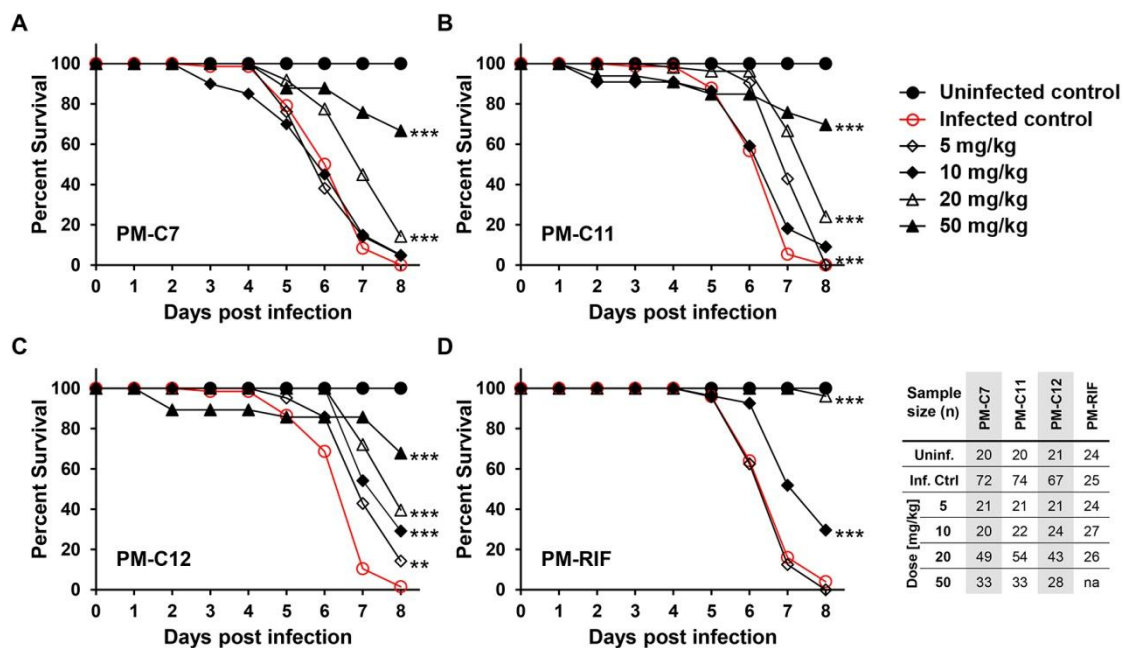

**Fig. 7. In vivo efficacy of PM-formulated nNF-derivatives against *M. marinum* infection in zebrafish embryos assessed by survival analysis.** *M. marinum*-dsRed infected zebrafish embryos were treated 1 day post infection with the indicated doses of the PM-formulated nNF-derivate C7 (A), C11 (B), C12 (C) (5 - 50 mg/kg) or PM-formulated Rifampicin (D) (5 – 20 mg/kg) by intravenous injection and survival was recorded daily. Uninfected, untreated embryos were used as negative control and *M. marinum* infected, untreated embryos as infection control group. Embryos used in this assay are the same as in the FPC assay (Fig. 6). Results are pooled from at least 3 independent experiments; na: not applicable; \*\*  $p < .01$ ; \*\*\*  $p < .001$ .

**Table 1: Toxicity indicators and criteria for scoring**

| Toxicity indicators            | Criteria for scoring drug toxicity |                               |
|--------------------------------|------------------------------------|-------------------------------|
|                                | 0                                  | 1                             |
| Equilibrium                    | Upright                            | Sideways                      |
| Escape response to light touch | Quick                              | Slow or none                  |
| Body shape                     | Normal (straight)                  | Malformed; curved             |
| Blood flow                     | Normal                             | Slow or not in all body parts |
| Heart beat                     | Normal                             | Irregular; very slow or fast  |
| Edema                          | Absent                             | Present                       |
| Swim bladder inflation         | Normal                             | Small or absent               |

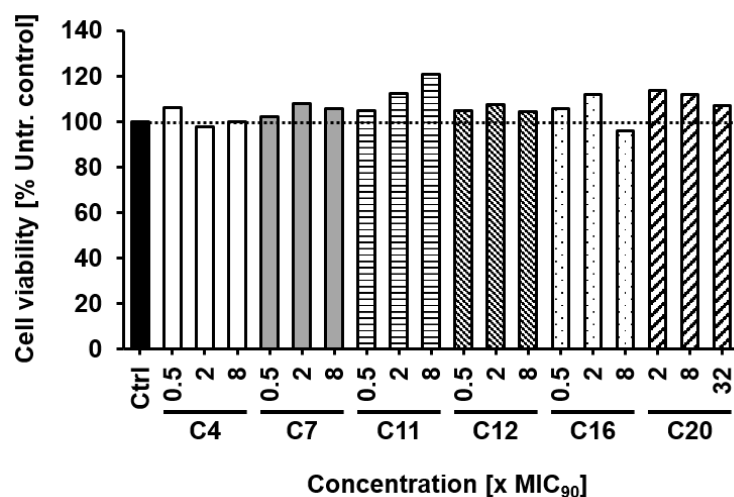

**Fig. S1. Cytotoxicity of nNF-derivatives in bone marrow-derived macrophages (BMDM).** BMDM cells were treated with nNF-derivatives at concentrations ranging from 0.5 to 32 times their MIC for three days and cell viability was measured using the CellTiter-Glo® cell viability assay (Promega Corporation, Wisconsin, USA) according to the producer's protocol.

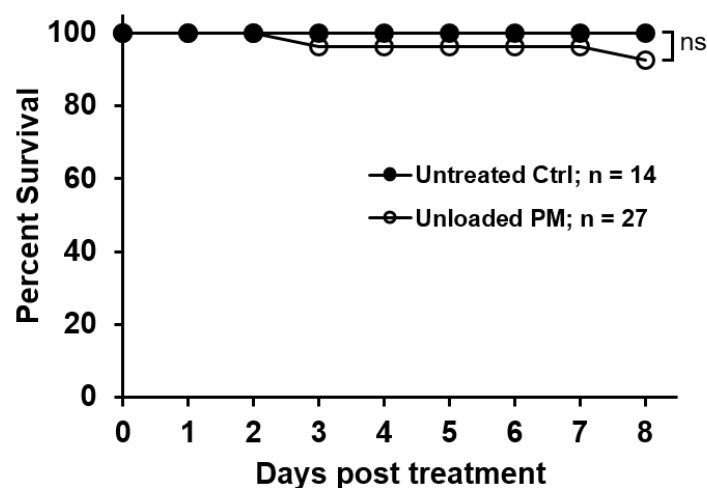

**Fig. S2. *In vivo* toxicity of unloaded PM in zebrafish embryos.** Zebrafish embryos were treated with unloaded PM at a dose equivalent to 150 mg/kg PM-formulated drug by intravenous injection. Mortality was recorded daily until 8 days post treatment and untreated embryos served as negative control. Data represent one experiment and was repeated twice with similar results; ns: not significant.



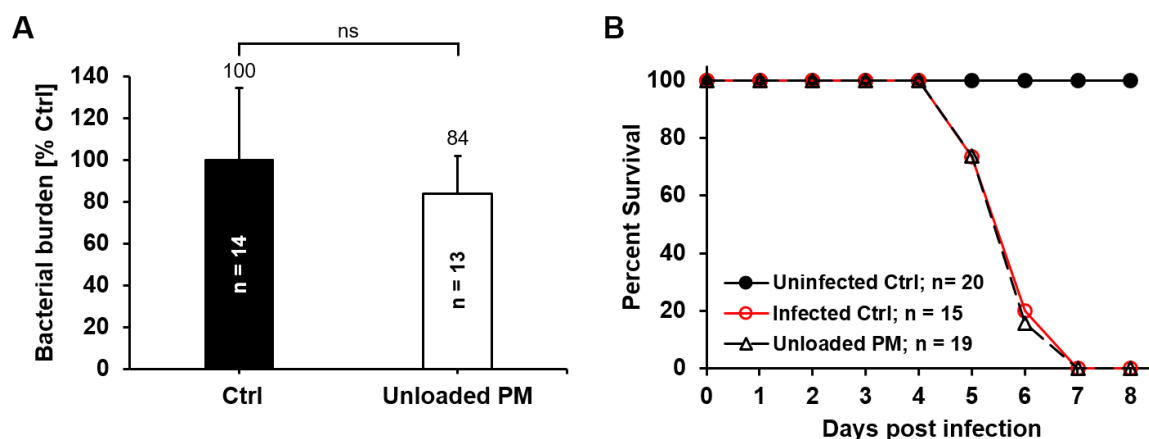

**Fig. S3. Effect of unloaded PM on bacterial burden and survival in zebrafish embryos infected with *M. marinum*.** Zebrafish embryos were infected with *M. marinum*-dsRed and treated 1 day post infection with unloaded PM at a dose equivalent to 75 mg/kg PM-formulated drug by intravenous injection. (A) Quantification of bacterial burden by FPC at 4 days post treatment in *M. marinum* infected embryos treated with unloaded PM or left untreated. FPC values of individual embryos were normalized to the untreated control group and results are presented as the mean  $\pm$  SD. The mean values of each group are displayed above the columns. (B) Survival of the zebrafish embryos used in the FPC assay over a period of 8 days post infection. Uninfected, untreated embryos served as negative control. Data in A) and B) represent one experiment and was repeated twice with similar results; ns: not significant.

**Table S1. *In vitro* activity of nNF-derivatives against extracellular *M. marinum* and intracellular bacteria in bone marrow-derived macrophages (BMDM).** The IC<sub>90</sub> and IC<sub>99</sub> of nNF-derivatives against intracellular *M. marinum* were calculated from the data of the macrophage infection assay shown in Fig. 2 and compared to the activity against extracellular bacteria by calculating the ratio between IC<sub>90</sub> and MIC<sub>90</sub>.

| Drug | MIC <sub>90</sub><br>μg/ml (μM) | IC <sub>90</sub><br>μg/ml (μM) | IC <sub>99</sub><br>μg/ml (μM) | IC <sub>90</sub> /MIC <sub>90</sub> |
|------|---------------------------------|--------------------------------|--------------------------------|-------------------------------------|
| C4   | 0.063 (0.23)                    | 0.05 (0.2)                     | 0.11 (0.4)                     | 0.86                                |
| C7   | 0.016 (0.06)                    | 0.007 (0.03)                   | 0.015 (0.06)                   | 0.44                                |
| C11  | 0.5 (2)                         | 0.31 (1.25)                    | 0.66 (2.62)                    | 0.62                                |
| C12  | 0.25 (0.9)                      | 0.12 (0.45)                    | 0.25 (0.89)                    | 0.56                                |
| C16  | 0.016 (0.07)                    | 0.013 (0.06)                   | 0.03 (0.11)                    | 0.82                                |
| C20  | 0.016 (0.05)                    | 0.4 (1.24)                     | 0.78 (2.45)                    | 24.82                               |
| RIF  | 0.1 (0.12)                      | 0.878 (1.07)                   | 1.97 (2.41)                    | 8.78                                |

**Table S2. Physicochemical characterization of polymeric micelles (PM) incorporating nNF-derivates.** The surface charge (zeta potential), mean hydrodynamic diameter and polydispersity index (PDI) of nNF derivative-encapsulating PM were determined by Dynamic light scattering (DLS) using a Zetasizer (Malvern Panalytical, United Kingdom).

| Name   | Cargo      | % weight<br>drug/polymer | Surface<br>charge [mV] | Diameter [nm] | PDI         |
|--------|------------|--------------------------|------------------------|---------------|-------------|
| PM-C4  | C4         | 14                       | -3.3 ± 0.1             | 130 ± 1       | 0.15 ± 0.01 |
| PM-C7  | C7         | 20                       | -3.5 ± 0.2             | 149 ± 1       | 0.15 ± 0.02 |
| PM-C11 | C11        | 20                       | -3.3 ± 0.4             | 93 ± 2        | 0.13 ± 0.01 |
| PM-C12 | C12        | 20                       | -3.3 ± 0.3             | 89 ± 1        | 0.11 ± 0.01 |
| PM-C16 | C16        | 20                       | -2.5 ± 0.1             | 85 ± 2        | 0.12 ± 0.02 |
| PM-C20 | C20        | 20                       | -2.6 ± 0.1             | 126 ± 1       | 0.12 ± 0.02 |
| PM-RIF | Rifampicin | 10                       | -2.5 ± 0.4             | 84 ± 0(.4)    | 0.14 ± 0.01 |
